# Supplementary material for: Photocatalytic Conversion of Fructose to Lactic Acid by BiOBr/Zn@SnO2 Material
Source: MDPI journal article supplement (doi:10.3390/catal12070719), 2022-06-30
Supplement: s1 [file s1]

Archive with 1 entries (1 files):
- catalysts-1736621-SI.pdf
